# Supplementary material for: Seasonal Influenza Vaccine Effectiveness in Persons Aged 15–64 Years: A Systematic Review and Meta-Analysis
Source: MDPI journal article supplement (doi:10.3390/vaccines11081322), 2023-08-04
Supplement: s1 [file s1]

**Table S1.** References of excluded studies

| References                                                                                                                                                                                                                                                                                                                                                                                                                                                                                                                                                                                                                                                                                          | Reasons for exclusion                          |
|-----------------------------------------------------------------------------------------------------------------------------------------------------------------------------------------------------------------------------------------------------------------------------------------------------------------------------------------------------------------------------------------------------------------------------------------------------------------------------------------------------------------------------------------------------------------------------------------------------------------------------------------------------------------------------------------------------|------------------------------------------------|
| 1. Zimmerman, R. K., Dauer, K., Clarke, L., Nowalk, M. P., Raviotta, J. M., & Balasubramani, G. K. (2023). Vaccine effectiveness of recombinant and standard dose influenza vaccines against outpatient illness during 2018-2019 and 2019-2020 calculated using a retrospective test-negative design. <i>Human vaccines &amp; immunotherapeutics</i> , 19(1), 2177461. <a href="https://doi.org/10.1080/21645515.2023.2177461">https://doi.org/10.1080/21645515.2023.2177461</a>                                                                                                                                                                                                                    | Insufficient information to determine outcomes |
| 2. Skowronski, D. M., Chuang, E. S., Sabaiduc, S., Kaweski, S. E., Kim, S., Dickinson, J. A., Olsha, R., Gubbay, J. B., Zelyas, N., Charest, H., Bastien, N., Jassem, A. N., & De Serres, G. (2023). Vaccine effectiveness estimates from an early-season influenza A(H3N2) epidemic, including unique genetic diversity with reassortment, Canada, 2022/23. <i>Euro surveillance : bulletin Europeen sur les maladies transmissibles = European communicable disease bulletin</i> , 28(5), 2300043. <a href="https://doi.org/10.2807/1560-7917.ES.2023.28.5.2300043">https://doi.org/10.2807/1560-7917.ES.2023.28.5.2300043</a>                                                                    | Not all strains                                |
| 3. Panatto, D., Domnich, A., Chironna, M., Loconsole, D., Napoli, C., Torsello, A., Manini, I., Montomoli, E., Pariani, E., Castaldi, S., Orsi, A., Icardi, G., & On Behalf Of The It-Bive-Hosp Network Study Group (2022). Surveillance of Severe Acute Respiratory Infection and Influenza Vaccine Effectiveness among Hospitalized Italian Adults, 2021/22 Season. <i>Vaccines</i> , 11(1), 83. <a href="https://doi.org/10.3390/vaccines11010083">https://doi.org/10.3390/vaccines11010083</a>                                                                                                                                                                                                  | Adults not isolated                            |
| 4. Stuurman, A. L., Levi, M., Beutels, P., Bricout, H., Descamps, A., Dos Santos, G., McGovern, I., Mira-Iglesias, A., Nauta, J., Torcel-Pagnon, L., Bicler, J., & DRIVE consortium (2023). Investigating confounding in network-based test-negative design influenza vaccine effectiveness studies-Experience from the DRIVE project. <i>Influenza and other respiratory viruses</i> , 17(1), e13087. <a href="https://doi.org/10.1111/irv.13087">https://doi.org/10.1111/irv.13087</a>                                                                                                                                                                                                            | Insufficient information to determine outcomes |
| 5. Tenforde, M. W., Patel, M. M., Lewis, N. M., Adams, K., Gaglani, M., Steingrub, J. S., Shapiro, N. I., Duggal, A., Prekker, M. E., Peltan, I. D., Hager, D. N., Gong, M. N., Exline, M. C., Ginde, A. A., Mohr, N. M., Mallow, C., Martin, E. T., Talbot, H. K., Gibbs, K. W., Kwon, J. H., ... Influenza and Other Viruses in the Acutely Ill (IVY) Network (2023). Vaccine Effectiveness Against Influenza A(H3N2)-Associated Hospitalized Illness: United States, 2022. <i>Clinical infectious diseases : an official publication of the Infectious Diseases Society of America</i> , 76(6), 1030–1037. <a href="https://doi.org/10.1093/cid/ciac869">https://doi.org/10.1093/cid/ciac869</a> | Seasons not isolated                           |
| 6. Hu, W., Sjoberg, P. A., DeMarcus, L. S., & Robbins, A. S. (2021). Influenza Vaccine Effectiveness Estimates among US Department of Defense Adult Beneficiaries over Four Consecutive Influenza Seasons: A Test-Negative Design Study with Different Control Groups. <i>Vaccines</i> , 10(1), 58. <a href="https://doi.org/10.3390/vaccines10010058">https://doi.org/10.3390/vaccines10010058</a>                                                                                                                                                                                                                                                                                                 | Seasons not isolated                           |
| 7. Maltezou, H. C., Stavros, S., Asimakopoulos, G., Pergialiotis, V., Raftopoulos, V., Talias, M. A., Pavli, A., Daskalakis, G., Sindos, M., Koutroumanis, P., Theodora, M., Antsaklis, P., Kostis, E., Stratiki, E., Kossyvakis, A., Theodoridou, M., Mentis, A., Drakakis, P., Loutradis, D., & Rodolakis, A. (2022). Effectiveness of maternal vaccination with quadrivalent inactivated influenza vaccine in pregnant women and their infants in 2019-2020. <i>Expert review of vaccines</i> , 21(7), 983–992. <a href="https://doi.org/10.1080/14760584.2022.2013820">https://doi.org/10.1080/14760584.2022.2013820</a>                                                                        | Not RCT or TND                                 |

|                                                                                                                                                                                                                                                                                                                                                                                                                                                                                                                                                                                                                                                                                                                        |                                                |
|------------------------------------------------------------------------------------------------------------------------------------------------------------------------------------------------------------------------------------------------------------------------------------------------------------------------------------------------------------------------------------------------------------------------------------------------------------------------------------------------------------------------------------------------------------------------------------------------------------------------------------------------------------------------------------------------------------------------|------------------------------------------------|
| 8. Butler, C., Ellis, C., Folegatti, P. M., Swayze, H., Allen, J., Bussey, L., Bellamy, D., Lawrie, A., Eagling-Vose, E., Yu, L. M., Shanyinde, M., Mair, C., Flaxman, A., Ewer, K., Gilbert, S., Evans, T. G., & On Behalf Of The Invictus Investigators (2021). Efficacy and Safety of a Modified Vaccinia Ankara-NP+M1 Vaccine Combined with QIV in People Aged 65 and Older: A Randomised Controlled Clinical Trial (INVICTUS). <i>Vaccines</i> , 9(8), 851. <a href="https://doi.org/10.3390/vaccines9080851">https://doi.org/10.3390/vaccines9080851</a>                                                                                                                                                         | Not a commercial vaccine                       |
| 9. Martínez-Baz, I., Navascués, A., Casado, I., Aguinaga, A., Ezpeleta, C., & Castilla, J. (2021). Simple models to include influenza vaccination history when evaluating the effect of influenza vaccination. <i>Euro surveillance : bulletin European sur les maladies transmissibles = European communicable disease bulletin</i> , 26(32), 2001099. <a href="https://doi.org/10.2807/1560-7917.ES.2021.26.32.2001099">https://doi.org/10.2807/1560-7917.ES.2021.26.32.2001099</a>                                                                                                                                                                                                                                  | Adults not isolated                            |
| 10. Thervil, J. W., DeMarcus, L. S., Eick-Cost, A., Hu, Z., Myers, C. A., Hollis, E. M., Balansay-Ames, M. S., Ellis, K., & Christy, N. C. (2021). Department of Defense mid-season vaccine effectiveness estimates for the 2019-2020 influenza season. <i>MSMR</i> , 28(6), 16–19.                                                                                                                                                                                                                                                                                                                                                                                                                                    | Insufficient information to determine outcomes |
| 11. Ghamande, S., Shaver, C., Murthy, K., Raiyani, C., White, H. D., Lat, T., Arroliga, A. C., Wyatt, D., Talbot, H. K., Martin, E. T., Monto, A. S., Zimmerman, R. K., Middleton, D. B., Silveira, F. P., Ferdinands, J. M., Patel, M. M., & Gaglani, M. (2022). Vaccine Effectiveness Against Acute Respiratory Illness Hospitalizations for Influenza-Associated Pneumonia During the 2015-2016 to 2017-2018 Seasons: US Hospitalized Adult Influenza Vaccine Effectiveness Network (HAIVEN). <i>Clinical infectious diseases : an official publication of the Infectious Diseases Society of America</i> , 74(8), 1329–1337. <a href="https://doi.org/10.1093/cid/ciab654">https://doi.org/10.1093/cid/ciab654</a> | Adults not isolated                            |
| 12. Kuliese, M., Mickiene, A., Jancoriene, L., Zablockiene, B., Gefenaite, G., & Study Group (2021). Age-Specific Seasonal Influenza Vaccine Effectiveness against Different Influenza Subtypes in the Hospitalized Population in Lithuania during the 2015-2019 Influenza Seasons. <i>Vaccines</i> , 9(5), 455. <a href="https://doi.org/10.3390/vaccines9050455">https://doi.org/10.3390/vaccines9050455</a>                                                                                                                                                                                                                                                                                                         | Adults not isolated                            |
| 13. Chan, Y. W., Wong, M. L., Kwok, F. Y., Au, A. K., Leung, E. C., & Chuang, S. K. (2021). The effect of seasonal influenza vaccine on medically-attended influenza and non-influenza respiratory viruses infections at primary care level, Hong Kong SAR, 2017/18 to 2019/20. <i>Vaccine</i> , 39(25), 3372–3378. <a href="https://doi.org/10.1016/j.vaccine.2021.04.059">https://doi.org/10.1016/j.vaccine.2021.04.059</a>                                                                                                                                                                                                                                                                                          | Insufficient information to determine outcomes |
| 14. de Lusignan, S., Hoang, U., Liyanage, H., Tripathy, M., Sherlock, J., Joy, M., Ferreira, F., Diez-Domingo, J., & Clark, T. (2021). Using Point of Care Testing to estimate influenza vaccine effectiveness in the English primary care sentinel surveillance network. <i>PloS one</i> , 16(3), e0248123. <a href="https://doi.org/10.1371/journal.pone.0248123">https://doi.org/10.1371/journal.pone.0248123</a>                                                                                                                                                                                                                                                                                                   | Adults not isolated                            |
| 15. Balasubramani, G. K., Zimmerman, R. K., Eng, H., Lyons, J., Clarke, L., & Nowalk, M. P. (2021). Comparison of local influenza vaccine effectiveness using two methods. <i>Vaccine</i> , 39(8), 1283–1289. <a href="https://doi.org/10.1016/j.vaccine.2021.01.013">https://doi.org/10.1016/j.vaccine.2021.01.013</a>                                                                                                                                                                                                                                                                                                                                                                                                | Adults not isolated                            |
| 16. Hughes, K., Middleton, D. B., Nowalk, M. P., Balasubramani, G. K., Martin, E. T., Gaglani, M., Talbot, H. K., Patel, M. M., Ferdinands, J. M., Zimmerman, R. K., Silveira, F. P., & HAIVEN Study Investigators (2021). Effectiveness of Influenza Vaccine for Preventing Laboratory-Confirmed Influenza Hospitalizations in Immunocompromised Adults. <i>Clinical infectious diseases : an official publication of the Infectious Diseases Society of America</i> , 73(11), e4353–e4360. <a href="https://doi.org/10.1093/cid/ciaa1927">https://doi.org/10.1093/cid/ciaa1927</a>                                                                                                                                   | Adults not isolated                            |

|                                                                                                                                                                                                                                                                                                                                                                                                                                                                                                                                                                                                                                            |                                                |
|--------------------------------------------------------------------------------------------------------------------------------------------------------------------------------------------------------------------------------------------------------------------------------------------------------------------------------------------------------------------------------------------------------------------------------------------------------------------------------------------------------------------------------------------------------------------------------------------------------------------------------------------|------------------------------------------------|
| <p>17. Tenforde, M. W., Talbot, H. K., Trabue, C. H., Gaglani, M., McNeal, T. M., Monto, A. S., Martin, E. T., Zimmerman, R. K., Silveira, F. P., Middleton, D. B., Olson, S. M., Garten Kondor, R. J., Barnes, J. R., Ferdinands, J. M., Patel, M. M., &amp; Hospitalized Adult Influenza Vaccine Effectiveness Network (HAIVEN) Investigators (2021). Influenza Vaccine Effectiveness Against Hospitalization in the United States, 2019-2020. <i>The Journal of infectious diseases</i>, 224(5), 813–820. <a href="https://doi.org/10.1093/infdis/jiaa800">https://doi.org/10.1093/infdis/jiaa800</a></p>                               | Insufficient information to determine outcomes |
| <p>18. Tenforde, M. W., Kondor, R. J. G., Chung, J. R., Zimmerman, R. K., Nowalk, M. P., Jackson, M. L., Jackson, L. A., Monto, A. S., Martin, E. T., Belongia, E. A., McLean, H. Q., Gaglani, M., Rao, A., Kim, S. S., Stark, T. J., Barnes, J. R., Wentworth, D. E., Patel, M. M., &amp; Flannery, B. (2021). Effect of Antigenic Drift on Influenza Vaccine Effectiveness in the United States-2019-2020. <i>Clinical infectious diseases : an official publication of the Infectious Diseases Society of America</i>, 73(11), e4244–e4250. <a href="https://doi.org/10.1093/cid/ciaa1884">https://doi.org/10.1093/cid/ciaa1884</a></p> | Adults not isolated                            |
| <p>19. Simpson, C. R., Lone, N. I., Kavanagh, K., Englishby, T., Robertson, C., McMenamin, J., Wissman, B. V., Vasileiou, E., Butler, C. C., Ritchie, L. D., Gunson, R., Schwarze, J., &amp; Sheikh, A. (2020). Vaccine effectiveness of live attenuated and trivalent inactivated influenza vaccination in 2010/11 to 2015/16: the SIVE II record linkage study. <i>Health technology assessment (Winchester, England)</i>, 24(67), 1–66. <a href="https://doi.org/10.3310/hta24670">https://doi.org/10.3310/hta24670</a></p>                                                                                                             | Adults not isolated                            |
| <p>20. Drori, Y., Pando, R., Sefty, H., Rosenberg, A., Mendelson, E., Keinan-Boker, L., Shohat, T., Mandelboim, M., Glatman-Freedman, A., &amp; Israel Influenza Surveillance Network IISN (2020). Influenza vaccine effectiveness against laboratory-confirmed influenza in a vaccine-mismatched influenza B-dominant season. <i>Vaccine</i>, 38(52), 8387–8395. <a href="https://doi.org/10.1016/j.vaccine.2020.10.074">https://doi.org/10.1016/j.vaccine.2020.10.074</a></p>                                                                                                                                                            | Insufficient information to determine outcomes |
| <p>21. Tsuzuki, S., Ishikane, M., Matsunaga, N., Morioka, S., Yu, J., Inagaki, T., Yamamoto, M., &amp; Ohmagari, N. (2021). Interim 2019/2020 Influenza Vaccine Effectiveness in Japan from October 2019 to January 2020. <i>Japanese journal of infectious diseases</i>, 74(3), 175–179. <a href="https://doi.org/10.7883/yoken.JJID.2020.177">https://doi.org/10.7883/yoken.JJID.2020.177</a></p>                                                                                                                                                                                                                                        | Not RCT or TND                                 |
| <p>22. Smith, E. R., Fry, A. M., Hicks, L. A., Fleming-Dutra, K. E., Flannery, B., Ferdinands, J., Rolfes, M. A., Martin, E. T., Monto, A. S., Zimmerman, R. K., Nowalk, M. P., Jackson, M. L., McLean, H. Q., Olson, S. C., Gaglani, M., &amp; Patel, M. M. (2020). Reducing Antibiotic Use in Ambulatory Care Through Influenza Vaccination. <i>Clinical infectious diseases : an official publication of the Infectious Diseases Society of America</i>, 71(11), e726–e734. <a href="https://doi.org/10.1093/cid/ciaa464">https://doi.org/10.1093/cid/ciaa464</a></p>                                                                   | Adults not isolated                            |
| <p>23. Balasubramani, G. K., Nowalk, M. P., Sax, T. M., Suyama, J., Bobyock, E., Rinaldo, C. R., Jr, Martin, E. T., Monto, A. S., Jackson, M. L., Gaglani, M. J., Flannery, B., Chung, J. R., &amp; Zimmerman, R. K. (2020). Influenza vaccine effectiveness among outpatients in the US Influenza Vaccine Effectiveness Network by study site 2011-2016. <i>Influenza and other respiratory viruses</i>, 14(4), 380–390. <a href="https://doi.org/10.1111/irv.12741">https://doi.org/10.1111/irv.12741</a></p>                                                                                                                            | Adults not isolated                            |
| <p>24. Tenforde, M. W., Chung, J., Smith, E. R., Talbot, H. K., Trabue, C. H., Zimmerman, R. K., Silveira, F. P., Gaglani, M., Murthy, K., Monto, A. S., Martin, E. T., McLean, H. Q., Belongia, E. A., Jackson, L. A., Jackson, M. L., Ferdinands, J. M., Flannery, B., &amp; Patel, M. M. (2021). Influenza Vaccine Effectiveness in Inpatient and Outpatient Settings in the United States, 2015-2018. <i>Clinical infectious diseases : an official publication of the Infectious Diseases Society of America</i>, 73(3), 386–392. <a href="https://doi.org/10.1093/cid/ciaa407">https://doi.org/10.1093/cid/ciaa407</a></p>           | Insufficient information to determine outcomes |

|                                                                                                                                                                                                                                                                                                                                                                                                                                                                                                                                                                                                                                                                              |                      |
|------------------------------------------------------------------------------------------------------------------------------------------------------------------------------------------------------------------------------------------------------------------------------------------------------------------------------------------------------------------------------------------------------------------------------------------------------------------------------------------------------------------------------------------------------------------------------------------------------------------------------------------------------------------------------|----------------------|
| 25. Glatman-Freedman, A., Pando, R., Sefty, H., Omer, I., Rosenberg, A., Drori, Y., Nemet, I., Mendelson, E., Keinan-Boker, L., Mandelboim, M., & Israeli Influenza Surveillance Network Iisn, F. T. (2020). Predominance of a Drifted Influenza A (H3N2) Clade and its Association with Age-specific Influenza Vaccine Effectiveness Variations, <i>Influenza Season 2018-2019. Vaccines</i> , 8(1), 78. <a href="https://doi.org/10.3390/vaccines8010078">https://doi.org/10.3390/vaccines8010078</a>                                                                                                                                                                      | Adults not isolated  |
| 26. Mouratidou, E., Lambrou, A., Andreopoulou, A., Gioula, G., Exindari, M., Kossyvakis, A., Pogka, V., Mentis, A., Georgakopoulou, T., & Lytras, T. (2020). Influenza vaccine effectiveness against hospitalization with laboratory-confirmed influenza in Greece: A pooled analysis across six seasons, 2013-2014 to 2018-2019. <i>Vaccine</i> , 38(12), 2715–2724. <a href="https://doi.org/10.1016/j.vaccine.2020.01.083">https://doi.org/10.1016/j.vaccine.2020.01.083</a>                                                                                                                                                                                              | Adults not isolated  |
| 27. Castilla, J., Portillo, M. E., Casado, I., Pozo, F., Navascués, A., Adelantado, M., Gómez Ibáñez, C., Ezpeleta, C., Martínez-Baz, I., & Primary Health Care Sentinel Network and Network for Influenza Surveillance in Hospitals of Navarre (2020). Effectiveness of the current and prior influenza vaccinations in Northern Spain, 2018-2019. <i>Vaccine</i> , 38(8), 1925–1932. <a href="https://doi.org/10.1016/j.vaccine.2020.01.028">https://doi.org/10.1016/j.vaccine.2020.01.028</a>                                                                                                                                                                             | Seasons not isolated |
| 28. Nation, M. L., Moss, R., Spittal, M. J., Kotsimbos, T., Kelly, P. M., & Cheng, A. C. (2021). Influenza Vaccine Effectiveness Against Influenza-Related Mortality in Australian Hospitalized Patients: A Propensity Score Analysis. <i>Clinical infectious diseases : an official publication of the Infectious Diseases Society of America</i> , 72(1), 99–107. <a href="https://doi.org/10.1093/cid/ciz1238">https://doi.org/10.1093/cid/ciz1238</a>                                                                                                                                                                                                                    | Adults not isolated  |
| 29. Skowronski, D. M., Sabaiduc, S., Leir, S., Rose, C., Zou, M., Murti, M., Dickinson, J. A., Olsha, R., Gubbay, J. B., Croxson, M. A., Charest, H., Bastien, N., Li, Y., Jassem, A., Krajden, M., & De Serres, G. (2019). Paradoxical clade- and age-specific vaccine effectiveness during the 2018/19 influenza A(H3N2) epidemic in Canada: potential imprint-regulated effect of vaccine (I-REV). <i>Euro surveillance : bulletin Européen sur les maladies transmissibles = European communicable disease bulletin</i> , 24(46), 1900585. <a href="https://doi.org/10.2807/1560-7917.ES.2019.24.46.1900585">https://doi.org/10.2807/1560-7917.ES.2019.24.46.1900585</a> | Not all strains      |
| 30. Vasileiou, E., Sheikh, A., Butler, C. C., Robertson, C., Kavanagh, K., Englishby, T., Lone, N. I., von Wissmann, B., McMenamin, J., Ritchie, L. D., Schwarze, J., Gunson, R., & Simpson, C. R. (2020). Seasonal Influenza Vaccine Effectiveness in People With Asthma: A National Test-Negative Design Case-Control Study. <i>Clinical infectious diseases : an official publication of the Infectious Diseases Society of America</i> , 71(7), e94–e104. <a href="https://doi.org/10.1093/cid/ciz1086">https://doi.org/10.1093/cid/ciz1086</a>                                                                                                                          | Adults not isolated  |
| 31. Pebody, R. G., Whitaker, H., Ellis, J., Andrews, N., Marques, D. F. P., Cottrell, S., Reynolds, A. J., Gunson, R., Thompson, C., Galiano, M., Lackenby, A., Robertson, C., O'Doherty, M. G., Owens, K., Yonova, I., Shepherd, S. J., Moore, C., Johnston, J., Donati, M., McMenamin, J., ... Zambon, M. (2020). End of season influenza vaccine effectiveness in primary care in adults and children in the United Kingdom in 2018/19. <i>Vaccine</i> , 38(3), 489–497. <a href="https://doi.org/10.1016/j.vaccine.2019.10.071">https://doi.org/10.1016/j.vaccine.2019.10.071</a>                                                                                        | Adults not isolated  |
| 32. Colucci, M. E., Veronesi, L., Bracchi, M. T., Zoni, R., Caruso, L., Capobianco, E., Rossi, D., Bizzarro, A., Cantarelli, A., & Affanni, P. (2019). On field vaccine effectiveness in three periods of 2018/2019 influenza season in Emilia-Romagna Region. <i>Acta bio-medica : Atenei Parmensis</i> , 90(9-S), 21–27. <a href="https://doi.org/10.23750/abm.v90i9-S.8699">https://doi.org/10.23750/abm.v90i9-S.8699</a>                                                                                                                                                                                                                                                 | Adults not isolated  |

|                                                                                                                                                                                                                                                                                                                                                                                                                                                                                                                                                                                                                                                                                                                                                                                                                                                   |                                                |
|---------------------------------------------------------------------------------------------------------------------------------------------------------------------------------------------------------------------------------------------------------------------------------------------------------------------------------------------------------------------------------------------------------------------------------------------------------------------------------------------------------------------------------------------------------------------------------------------------------------------------------------------------------------------------------------------------------------------------------------------------------------------------------------------------------------------------------------------------|------------------------------------------------|
| <p>33. Castillejos, M., Cabello-Gutiérrez, C., Alberto Choreño-Parra, J., Hernández, V., Romo, J., Hernández-Sánchez, F., Martínez, D., Hernández, A., Jiménez-Álvarez, L., Hernández-Cardenas, C. M., Becerril-Vargas, E., Martínez-Orozco, J. A., Luis Sandoval-Gutiérrez, J., Guadarrama, C., Olvera-Masetto, E., Alfaro-Ramos, L., Cruz-Lagunas, A., Ramírez, G., Márquez, E., Pimentel, L., ... Zúñiga, J. (2019). High performance of rapid influenza diagnostic test and variable effectiveness of influenza vaccines in Mexico. <i>International journal of infectious diseases : IJID : official publication of the International Society for Infectious Diseases</i>, 89, 87–95. <a href="https://doi.org/10.1016/j.ijid.2019.08.029">https://doi.org/10.1016/j.ijid.2019.08.029</a></p>                                                | Adults not isolated                            |
| <p>34. Ng, Y., Nandar, K., Chua, L. A. V., Mak, T. M., Foo, K., Muhammad, I. R., Low, C. K. K., Ma, S., Ooi, S. P., Lin, R. T. P., James, L., &amp; Lee, V. J. M. (2019). Evaluating the effectiveness of the influenza vaccine during respiratory outbreaks in Singapore's long term care facilities, 2017. <i>Vaccine</i>, 37(29), 3925–3931. <a href="https://doi.org/10.1016/j.vaccine.2019.03.054">https://doi.org/10.1016/j.vaccine.2019.03.054</a></p>                                                                                                                                                                                                                                                                                                                                                                                     | Adults not isolated                            |
| <p>35. Puig-Barberà, J., Mira-Iglesias, A., Burtseva, E., Cowling, B. J., Serhat, U., Ruiz-Palacios, G. M., Launay, O., Kyncl, J., Koul, P., Siqueira, M. M., Sominina, A., &amp; Global Influenza Hospital Surveillance Network (2019). Influenza epidemiology and influenza vaccine effectiveness during the 2015-2016 season: results from the Global Influenza Hospital Surveillance Network. <i>BMC infectious diseases</i>, 19(1), 415. <a href="https://doi.org/10.1186/s12879-019-4017-0">https://doi.org/10.1186/s12879-019-4017-0</a></p>                                                                                                                                                                                                                                                                                               | Adults not isolated                            |
| <p>36. Coleman, R., Eick-Cost, A. A., Hawksworth, A. W., Hu, Z., Lynch, L., Myers, C. A., DeMarcus, L., &amp; Federinko, S. (2018). Department of Defense end-of-season influenza vaccine effectiveness estimates for the 2017-2018 season. <i>MSMR</i>, 25(10), 16–20.</p>                                                                                                                                                                                                                                                                                                                                                                                                                                                                                                                                                                       | Insufficient information to determine outcomes |
| <p>37. Baselga-Moreno, V., Trushakova, S., McNeil, S., Sominina, A., Nunes, M. C., Draganescu, A., Unal, S., Koul, P., Kyncl, J., Zhang, T., Kuatbayeva, A., Ben-Salah, A., Burtseva, E., Puig-Barberà, J., Díez-Domingo, J., &amp; Global Influenza Hospital Surveillance Network (GIHSN) (2019). Influenza epidemiology and influenza vaccine effectiveness during the 2016-2017 season in the Global Influenza Hospital Surveillance Network (GIHSN). <i>BMC public health</i>, 19(1), 487. <a href="https://doi.org/10.1186/s12889-019-6713-5">https://doi.org/10.1186/s12889-019-6713-5</a></p>                                                                                                                                                                                                                                              | Adults not isolated                            |
| <p>38. Rolfes, M. A., Flannery, B., Chung, J. R., O'Halloran, A., Garg, S., Belongia, E. A., Gaglani, M., Zimmerman, R. K., Jackson, M. L., Monto, A. S., Alden, N. B., Anderson, E., Bennett, N. M., Billing, L., Eckel, S., Kirley, P. D., Lynfield, R., Monroe, M. L., Spencer, M., Spina, N., ... US Influenza Vaccine Effectiveness (Flu VE) Network, the Influenza Hospitalization Surveillance Network, and the Assessment Branch, Immunization Services Division, Centers for Disease Control and Prevention (2019). Effects of Influenza Vaccination in the United States During the 2017-2018 Influenza Season. <i>Clinical infectious diseases : an official publication of the Infectious Diseases Society of America</i>, 69(11), 1845–1853. <a href="https://doi.org/10.1093/cid/ciz075">https://doi.org/10.1093/cid/ciz075</a></p> | Insufficient information to determine outcomes |
| <p>39. Ferdinands, J. M., Gaglani, M., Martin, E. T., Middleton, D., Monto, A. S., Murthy, K., Silveira, F. P., Talbot, H. K., Zimmerman, R., Alyanak, E., Strickland, C., Spencer, S., Fry, A. M., &amp; HAIVEN Study Investigators (2019). Prevention of Influenza Hospitalization Among Adults in the United States, 2015-2016: Results From the US Hospitalized Adult Influenza Vaccine Effectiveness Network (HAIVEN). <i>The Journal of infectious diseases</i>, 220(8), 1265–1275. <a href="https://doi.org/10.1093/infdis/jiy723">https://doi.org/10.1093/infdis/jiy723</a></p>                                                                                                                                                                                                                                                           | Adults not isolated                            |



|                                                                                                                                                                                                                                                                                                                                                                                                                                                                                                                                                                                                                                                                                                                                                                                                                                                                  |                                                |
|------------------------------------------------------------------------------------------------------------------------------------------------------------------------------------------------------------------------------------------------------------------------------------------------------------------------------------------------------------------------------------------------------------------------------------------------------------------------------------------------------------------------------------------------------------------------------------------------------------------------------------------------------------------------------------------------------------------------------------------------------------------------------------------------------------------------------------------------------------------|------------------------------------------------|
| 40. Shang, M., Chung, J. R., Jackson, M. L., Jackson, L. A., Monto, A. S., Martin, E. T., Belongia, E. A., McLean, H. Q., Gaglani, M., Murthy, K., Zimmerman, R. K., Nowalk, M. P., Fry, A. M., & Flannery, B. (2018). Influenza vaccine effectiveness among patients with high-risk medical conditions in the United States, 2012-2016. <i>Vaccine</i> , 36(52), 8047–8053. <a href="https://doi.org/10.1016/j.vaccine.2018.10.093">https://doi.org/10.1016/j.vaccine.2018.10.093</a>                                                                                                                                                                                                                                                                                                                                                                           | Adults not isolated                            |
| 41. Tam, Y. H., Ng, T. W. Y., Chu, D. K. W., Fang, V. J., Cowling, B. J., Malik Peiris, J. S., & Ip, D. K. M. (2018). The effectiveness of influenza vaccination against medically-attended illnesses in Hong Kong across three years with different degrees of vaccine match, 2014-17. <i>Vaccine</i> , 36(41), 6117–6123. <a href="https://doi.org/10.1016/j.vaccine.2018.08.075">https://doi.org/10.1016/j.vaccine.2018.08.075</a>                                                                                                                                                                                                                                                                                                                                                                                                                            | Seasons not isolated                           |
| 42. Thompson, M. G., Pierse, N., Sue Huang, Q., Prasad, N., Duque, J., Claire Newbern, E., Baker, M. G., Turner, N., McArthur, C., & SHIVERS investigation team (2018). Influenza vaccine effectiveness in preventing influenza-associated intensive care admissions and attenuating severe disease among adults in New Zealand 2012-2015. <i>Vaccine</i> , 36(39), 5916–5925. <a href="https://doi.org/10.1016/j.vaccine.2018.07.028">https://doi.org/10.1016/j.vaccine.2018.07.028</a>                                                                                                                                                                                                                                                                                                                                                                         | Adults not isolated                            |
| 43. Andrew, M. K., Shinde, V., Hatchette, T., Ambrose, A., Boivin, G., Bowie, W., Chit, A., Dos Santos, G., ElSherif, M., Green, K., Haguinet, F., Halperin, S. A., Ibaraguchi, B., Johnstone, J., Katz, K., Langley, J. M., LeBlanc, J., Loeb, M., MacKinnon-Cameron, D., McCarthy, A., ... Public Health Agency of Canada/Canadian Institutes of Health Research Influenza Research Network (PCIRN) Serious Outcomes Surveillance Network and the Toronto Invasive Bacterial Diseases Network (TIBDN) (2017). Influenza vaccine effectiveness against influenza-related hospitalization during a season with mixed outbreaks of four influenza viruses: a test-negative case-control study in adults in Canada. <i>BMC infectious diseases</i> , 17(1), 805. <a href="https://doi.org/10.1186/s12879-017-2905-8">https://doi.org/10.1186/s12879-017-2905-8</a> | Adults not isolated                            |
| 44. Puig-Barberà, J., Mira-Iglesias, A., Tortajada-Girbés, M., López-Labrador, F. X., Librero-López, J., Díez-Domingo, J., Carballido-Fernández, M., Carratalá-Munuera, C., Correcher-Medina, P., Gil-Guillén, V., Limón-Ramírez, R., Mollar-Maseras, J., Otero-Reigada, M. C., Schwarz, H., & Valencia Hospital Network for the Study of Influenza and other Respiratory Viruses (VAHNSI, Spain) (2017). Waning protection of influenza vaccination during four influenza seasons, 2011/2012 to 2014/2015. <i>Vaccine</i> , 35(43), 5799–5807. <a href="https://doi.org/10.1016/j.vaccine.2017.09.035">https://doi.org/10.1016/j.vaccine.2017.09.035</a>                                                                                                                                                                                                        | Insufficient information to determine outcomes |
| 45. Hekimoğlu, C. H., Emek, M., Avcı, E., Topal, S., Demiröz, M., & Ergör, G. (2018). Seasonal Influenza Vaccine Effectiveness in Preventing Laboratory Confirmed Influenza in 2014-2015 Season in Turkey: A Test-Negative Case Control Study. <i>Balkan medical journal</i> , 35(1), 77–83. <a href="https://doi.org/10.4274/balkanmedj.2017.0487">https://doi.org/10.4274/balkanmedj.2017.0487</a>                                                                                                                                                                                                                                                                                                                                                                                                                                                             | Adults not isolated                            |
| 46. Gherasim, A., Martínez-Baz, I., Castilla, J., Pozo, F., Larrauri, A., & cycEVA working group (2017). Effect of previous and current vaccination against influenza A(H1N1)pdm09, A(H3N2), and B during the post-pandemic period 2010-2016 in Spain. <i>PloS one</i> , 12(6), e0179160. <a href="https://doi.org/10.1371/journal.pone.0179160">https://doi.org/10.1371/journal.pone.0179160</a>                                                                                                                                                                                                                                                                                                                                                                                                                                                                | Insufficient information to determine outcomes |
| 47. van Doorn, E., Darvishian, M., Dijkstra, F., Bijlsma, M. J., Donker, G. A., de Lange, M. M. A., Cadenau, L. M., Hak, E., & Meijer, A. (2017). Effectiviteit van influenzavaccinatie in Nederland [Effectiveness of influenza vaccine in the Netherlands: predominant circulating virus type and vaccine match are important conditions]. <i>Nederlands tijdschrift voor geneeskunde</i> , 161, D1648.                                                                                                                                                                                                                                                                                                                                                                                                                                                        | Not English                                    |

|                                                                                                                                                                                                                                                                                                                                                                                                                                                                                                                                                                                    |                                                |
|------------------------------------------------------------------------------------------------------------------------------------------------------------------------------------------------------------------------------------------------------------------------------------------------------------------------------------------------------------------------------------------------------------------------------------------------------------------------------------------------------------------------------------------------------------------------------------|------------------------------------------------|
| 48. Noh, J. Y., Lim, S., Song, J. Y., Choi, W. S., Jeong, H. W., Heo, J. Y., Lee, J., Seo, Y. B., Lee, J. S., Wie, S. H., Kim, Y. K., Park, K. H., Jung, S. I., Kim, S. W., Lee, S. H., Lee, H. S., Yoon, Y. H., Cheong, H. J., & Kim, W. J. (2017). Interim estimates of the effectiveness of the influenza vaccine against A(H3N2) influenza in adults in South Korea, 2016-2017 season. <i>PloS one</i> , 12(5), e0178010. <a href="https://doi.org/10.1371/journal.pone.0178010">https://doi.org/10.1371/journal.pone.0178010</a>                                              | Not English                                    |
| 49. Zhang, Y., Wu, P., Feng, L., Yang, P., Pan, Y., Feng, S., Qin, Y., Zheng, J., Puig-Barberà, J., Muscatello, D., MacIntyre, R., Cowling, B. J., Yu, H., & Wang, Q. (2017). Influenza vaccine effectiveness against influenza-associated hospitalization in 2015/16 season, Beijing, China. <i>Vaccine</i> , 35(23), 3129–3134. <a href="https://doi.org/10.1016/j.vaccine.2017.03.084">https://doi.org/10.1016/j.vaccine.2017.03.084</a>                                                                                                                                        | Adults not isolated                            |
| 50. Martínez-Baz, I., Casado, I., Navascués, A., Díaz-González, J., Aguinaga, A., Barrado, L., Delfrade, J., Ezpeleta, C., & Castilla, J. (2017). Effect of Repeated Vaccination With the Same Vaccine Component Against 2009 Pandemic Influenza A(H1N1) Virus. <i>The Journal of infectious diseases</i> , 215(6), 847–855. <a href="https://doi.org/10.1093/infdis/jix055">https://doi.org/10.1093/infdis/jix055</a>                                                                                                                                                             | Adults not isolated                            |
| 51. van Doorn, E., Darvishian, M., Dijkstra, F., Donker, G. A., Overduin, P., Meijer, A., & Hak, E. (2017). Influenza vaccine effectiveness estimates in the Dutch population from 2003 to 2014: The test-negative design case-control study with different control groups. <i>Vaccine</i> , 35(21), 2831–2839. <a href="https://doi.org/10.1016/j.vaccine.2017.04.012">https://doi.org/10.1016/j.vaccine.2017.04.012</a>                                                                                                                                                          | Insufficient information to determine outcomes |
| 52. Cheng, A. C., Macartney, K. K., Waterer, G. W., Kotsimbos, T., Kelly, P. M., Blyth, C. C., & Influenza Complications Alert Network (FluCAN) Investigators (2017). Repeated Vaccination Does Not Appear to Impact Upon Influenza Vaccine Effectiveness Against Hospitalization With Confirmed Influenza. <i>Clinical infectious diseases : an official publication of the Infectious Diseases Society of America</i> , 64(11), 1564–1572. <a href="https://doi.org/10.1093/cid/cix209">https://doi.org/10.1093/cid/cix209</a>                                                   | Seasons not isolated                           |
| 53. Skowronski, D. M., Chambers, C., Sabaiduc, S., Dickinson, J. A., Winter, A. L., De Serres, G., Drews, S. J., Jassem, A., Gubbay, J. B., Charest, H., Balshaw, R., Bastien, N., Li, Y., & Krajden, M. (2017). Interim estimates of 2016/17 vaccine effectiveness against influenza A(H3N2), Canada, January 2017. <i>Euro surveillance : bulletin Européen sur les maladies transmissibles = European communicable disease bulletin</i> , 22(6), 30460. <a href="https://doi.org/10.2807/1560-7917.ES.2017.22.6.30460">https://doi.org/10.2807/1560-7917.ES.2017.22.6.30460</a> | Not all strains                                |
| 54. Skowronski, D. M., Chambers, C., De Serres, G., Sabaiduc, S., Winter, A. L., Dickinson, J. A., Gubbay, J. B., Fonseca, K., Drews, S. J., Charest, H., Martineau, C., Krajden, M., Petric, M., Bastien, N., Li, Y., & Smith, D. J. (2017). Serial Vaccination and the Antigenic Distance Hypothesis: Effects on Influenza Vaccine Effectiveness During A(H3N2) Epidemics in Canada, 2010-2011 to 2014-2015. <i>The Journal of infectious diseases</i> , 215(7), 1059–1099. <a href="https://doi.org/10.1093/infdis/jix074">https://doi.org/10.1093/infdis/jix074</a>            | Insufficient information to determine outcomes |
| 55. Darvishian, M., Dijkstra, F., van Doorn, E., Bijlsma, M. J., Donker, G. A., de Lange, M. M., Cadenau, L. M., Hak, E., & Meijer, A. (2017). Influenza Vaccine Effectiveness in the Netherlands from 2003/2004 through 2013/2014: The Importance of Circulating Influenza Virus Types and Subtypes. <i>PloS one</i> , 12(1), e0169528. <a href="https://doi.org/10.1371/journal.pone.0169528">https://doi.org/10.1371/journal.pone.0169528</a>                                                                                                                                   | Seasons not isolated                           |
| 56. Saito, N., Komori, K., Suzuki, M., Morimoto, K., Kishikawa, T., Yasaka, T., & Ariyoshi, K. (2017). Negative impact of prior influenza vaccination on current influenza vaccination among people infected and not infected in prior season: A test-negative case-control study in Japan. <i>Vaccine</i> , 35(4), 687–693. <a href="https://doi.org/10.1016/j.vaccine.2016.11.024">https://doi.org/10.1016/j.vaccine.2016.11.024</a>                                                                                                                                             | Insufficient information to determine outcomes |

|                                                                                                                                                                                                                                                                                                                                                                                                                                                                                                                                                                                                                |                                                |
|----------------------------------------------------------------------------------------------------------------------------------------------------------------------------------------------------------------------------------------------------------------------------------------------------------------------------------------------------------------------------------------------------------------------------------------------------------------------------------------------------------------------------------------------------------------------------------------------------------------|------------------------------------------------|
| 57. Seki, Y., Oonishi, H., Onose, A., & Sugaya, N. (2016). Kansenshogaku zasshi. The Journal of the Japanese Association for Infectious Diseases, 90(4), 486–492.                                                                                                                                                                                                                                                                                                                                                                                                                                              | Not English                                    |
| 58. Flannery, B., Zimmerman, R. K., Gubareva, L. V., Garten, R. J., Chung, J. R., Nowalk, M. P., Jackson, M. L., Jackson, L. A., Monto, A. S., Ohmit, S. E., Belongia, E. A., McLean, H. Q., Gaglani, M., Piedra, P. A., Mishin, V. P., Chesnokov, A. P., Spencer, S., Thaker, S. N., Barnes, J. R., Foust, A., ... Fry, A. M. (2016). Enhanced Genetic Characterization of Influenza A(H3N2) Viruses and Vaccine Effectiveness by Genetic Group, 2014–2015. The Journal of infectious diseases, 214(7), 1010–1019. <a href="https://doi.org/10.1093/infdis/jiw181">https://doi.org/10.1093/infdis/jiw181</a>  | Insufficient information to determine outcomes |
| 59. Qin, Y., Zhang, Y., Wu, P., Feng, S., Zheng, J., Yang, P., Pan, Y., Wang, Q., Feng, L., Pang, X., Puig-Barberà, J., Yu, H., & Cowling, B. J. (2016). Influenza vaccine effectiveness in preventing hospitalization among Beijing residents in China, 2013–15. Vaccine, 34(20), 2329–2333. <a href="https://doi.org/10.1016/j.vaccine.2016.03.068">https://doi.org/10.1016/j.vaccine.2016.03.068</a>                                                                                                                                                                                                        | Seasons not isolated                           |
| 60. Chambers, C., Skowronski, D. M., Sabaiduc, S., Winter, A. L., Dickinson, J. A., De Serres, G., Gubbay, J. B., Drews, S. J., Martineau, C., Eshaghi, A., Krajden, M., Bastien, N., & Li, Y. (2016). Interim estimates of 2015/16 vaccine effectiveness against influenza A(H1N1)pdm09, Canada, February 2016. Euro surveillance : bulletin Européen sur les maladies transmissibles = European communicable disease bulletin, 21(11), 30168. <a href="https://doi.org/10.2807/1560-7917.ES.2016.21.11.30168">https://doi.org/10.2807/1560-7917.ES.2016.21.11.30168</a>                                      | Adults not isolated                            |
| 61. Talbot, H. K., Nian, H., Chen, Q., Zhu, Y., Edwards, K. M., & Griffin, M. R. (2016). Evaluating the case-positive, control test-negative study design for influenza vaccine effectiveness for the frailty bias. Vaccine, 34(15), 1806–1809. <a href="https://doi.org/10.1016/j.vaccine.2016.02.037">https://doi.org/10.1016/j.vaccine.2016.02.037</a>                                                                                                                                                                                                                                                      | Adults not isolated                            |
| 62. Castilla, J., Navascués, A., Fernández-Alonso, M., Reina, G., Pozo, F., Casado, I., Guevara, M., Martínez-Baz, I., Barricarte, A., Ezpeleta, C., Primary Health Care Sentinel Network, & Network for Influenza Surveillance in Hospitals of Navarra (2016). Effectiveness of subunit influenza vaccination in the 2014–2015 season and residual effect of split vaccination in previous seasons. Vaccine, 34(11), 1350–1357. <a href="https://doi.org/10.1016/j.vaccine.2016.01.054">https://doi.org/10.1016/j.vaccine.2016.01.054</a>                                                                     | Insufficient information to determine outcomes |
| 63. Lane, C. R., Carville, K. S., Pierse, N., & Kelly, H. A. (2016). Seasonal influenza vaccine effectiveness estimates: Development of a parsimonious case test negative model using a causal approach. Vaccine, 34(8), 1070–1076. <a href="https://doi.org/10.1016/j.vaccine.2016.01.002">https://doi.org/10.1016/j.vaccine.2016.01.002</a>                                                                                                                                                                                                                                                                  | Insufficient information to determine outcomes |
| 64. Gaglani, M., Pruszynski, J., Murthy, K., Clipper, L., Robertson, A., Reis, M., Chung, J. R., Piedra, P. A., Avadhanula, V., Nowalk, M. P., Zimmerman, R. K., Jackson, M. L., Jackson, L. A., Petrie, J. G., Ohmit, S. E., Monto, A. S., McLean, H. Q., Belongia, E. A., Fry, A. M., & Flannery, B. (2016). Influenza Vaccine Effectiveness Against 2009 Pandemic Influenza A(H1N1) Virus Differed by Vaccine Type During 2013–2014 in the United States. The Journal of infectious diseases, 213(10), 1546–1556. <a href="https://doi.org/10.1093/infdis/jiv577">https://doi.org/10.1093/infdis/jiv577</a> | Insufficient information to determine outcomes |
| 65. Pierse, N., Kelly, H., Thompson, M. G., Bissielo, A., Radke, S., Huang, Q. S., Baker, M. G., Turner, N., & SHIVERS investigation team (2016). Influenza vaccine effectiveness for hospital and community patients using control groups with and without non-influenza respiratory viruses detected, Auckland, New Zealand 2014. Vaccine, 34(4), 503–509. <a href="https://doi.org/10.1016/j.vaccine.2015.11.073">https://doi.org/10.1016/j.vaccine.2015.11.073</a>                                                                                                                                         | Insufficient information to determine outcomes |



|                                                                                                                                                                                                                                                                                                                                                                                                                                                                                                                                                                                                                                                                                                                                                                              |                                                |
|------------------------------------------------------------------------------------------------------------------------------------------------------------------------------------------------------------------------------------------------------------------------------------------------------------------------------------------------------------------------------------------------------------------------------------------------------------------------------------------------------------------------------------------------------------------------------------------------------------------------------------------------------------------------------------------------------------------------------------------------------------------------------|------------------------------------------------|
| 66. Pebody, R., Warburton, F., Andrews, N., Ellis, J., von Wissmann, B., Robertson, C., Yonova, I., Cottrell, S., Gallagher, N., Green, H., Thompson, C., Galiano, M., Marques, D., Gunson, R., Reynolds, A., Moore, C., Mullett, D., Pathirannehelage, S., Donati, M., Johnston, J., ... Zambon, M. (2015). Effectiveness of seasonal influenza vaccine in preventing laboratory-confirmed influenza in primary care in the United Kingdom: 2014/15 end of season results. <i>Euro surveillance : bulletin Europeen sur les maladies transmissibles = European communicable disease bulletin</i> , 20(36), 10.2807/1560-7917.ES.2015.20.36.30013. <a href="https://doi.org/10.2807/1560-7917.ES.2015.20.36.30013">https://doi.org/10.2807/1560-7917.ES.2015.20.36.30013</a> | Insufficient information to determine outcomes |
| 67. Jimenez-Jorge, S., de Mateo, S., Delgado-Sanz, C., Pozo, F., Casas, I., Garcia-Cenoz, M., Castilla, J., Rodriguez, C., Vega, T., Quinones, C., Martinez, E., Vanrell, J. M., Gimenez, J., Castrillejo, D., Altzibar, J. M., Carril, F., Ramos, J. M., Serrano, M. C., Martinez, A., Torner, N., ... Spanish Influenza Sentinel Surveillance System (2015). Estimating influenza vaccine effectiveness in Spain using sentinel surveillance data. <i>Euro surveillance : bulletin Europeen sur les maladies transmissibles = European communicable disease bulletin</i> , 20(28), 21187. <a href="https://doi.org/10.2807/1560-7917.es2015.20.28.21187">https://doi.org/10.2807/1560-7917.es2015.20.28.21187</a>                                                          | Not all strains                                |
| 68. Martínez-Baz, I., Navascués, A., Pozo, F., Chamorro, J., Albeniz, E., Casado, I., Reina, G., Cenoz, M. G., Ezpeleta, C., Castilla, J., & Primary Health Care Sentinel Network and Network for Influenza Surveillance in Hospitals of Navarra (2015). Influenza vaccine effectiveness in preventing inpatient and outpatient cases in a season dominated by vaccine-matched influenza B virus. <i>Human vaccines &amp; immunotherapeutics</i> , 11(7), 1626–1633. <a href="https://doi.org/10.1080/21645515.2015.1038002">https://doi.org/10.1080/21645515.2015.1038002</a>                                                                                                                                                                                               | Adults not isolated                            |
| 69. Valenciano, M., Kissling, E., Reuss, A., Jiménez-Jorge, S., Horváth, J. K., Donnell, J. M., Pitigoi, D., Machado, A., Pozo, F., & I-MOVE Multicentre Case Control Study Team (2015). The European I-MOVE Multicentre 2013-2014 Case-Control Study. Homogeneous moderate influenza vaccine effectiveness against A(H1N1)pdm09 and heterogenous results by country against A(H3N2). <i>Vaccine</i> , 33(24), 2813–2822. <a href="https://doi.org/10.1016/j.vaccine.2015.04.012">https://doi.org/10.1016/j.vaccine.2015.04.012</a>                                                                                                                                                                                                                                          | Not all strains                                |
| 70. Jiménez-Jorge, S., Pozo, F., Larrauri, A., & cycEVA Study Team (2015). Interim influenza vaccine effectiveness: A good proxy for final estimates in Spain in the seasons 2010-2014. <i>Vaccine</i> , 33(29), 3276–3280. <a href="https://doi.org/10.1016/j.vaccine.2015.03.051">https://doi.org/10.1016/j.vaccine.2015.03.051</a>                                                                                                                                                                                                                                                                                                                                                                                                                                        | Adults not isolated                            |
| 71. Simpson, C. R., Lone, N. I., Kavanagh, K., Ritchie, L. D., Robertson, C., Sheikh, A., & McMenamin, J. (2015). Trivalent inactivated seasonal influenza vaccine effectiveness for the prevention of laboratory-confirmed influenza in a Scottish population 2000 to 2009. <i>Euro surveillance : bulletin Europeen sur les maladies transmissibles = European communicable disease bulletin</i> , 20(8), 21043. <a href="https://doi.org/10.2807/1560-7917.es2015.20.8.21043">https://doi.org/10.2807/1560-7917.es2015.20.8.21043</a>                                                                                                                                                                                                                                     | Adults not isolated                            |
| 72. Lytras, T., Kossyvakis, A., Melidou, A., Exindari, M., Gioula, G., Pogka, V., Malisiovas, N., & Mentis, A. (2015). Influenza vaccine effectiveness against laboratory confirmed influenza in Greece during the 2013-2014 season: a test-negative study. <i>Vaccine</i> , 33(2), 367–373. <a href="https://doi.org/10.1016/j.vaccine.2014.11.005">https://doi.org/10.1016/j.vaccine.2014.11.005</a>                                                                                                                                                                                                                                                                                                                                                                       | Adults not isolated                            |
| 73. Carville, K. S., Grant, K. A., Sullivan, S. G., Fielding, J. E., Lane, C. R., Franklin, L., Druce, J., & Kelly, H. A. (2015). Understanding influenza vaccine protection in the community: an assessment of the 2013 influenza season in Victoria, Australia. <i>Vaccine</i> , 33(2), 341–345. <a href="https://doi.org/10.1016/j.vaccine.2014.11.019">https://doi.org/10.1016/j.vaccine.2014.11.019</a>                                                                                                                                                                                                                                                                                                                                                                 | Adults not isolated                            |

|                                                                                                                                                                                                                                                                                                                                                                                                                                                                                                                                                                                                                                                                                                                                                                                                                                                          |                                                |
|----------------------------------------------------------------------------------------------------------------------------------------------------------------------------------------------------------------------------------------------------------------------------------------------------------------------------------------------------------------------------------------------------------------------------------------------------------------------------------------------------------------------------------------------------------------------------------------------------------------------------------------------------------------------------------------------------------------------------------------------------------------------------------------------------------------------------------------------------------|------------------------------------------------|
| 74. Puig-Barberà, J., García-de-Lomas, J., Díez-Domingo, J., Arnedo-Pena, A., Ruiz-García, M., Limón-Ramírez, R., Pérez-Vilar, S., Micó-Esparza, J. L., Tortajada-Girbés, M., Carratalá-Munuera, C., Larrea-González, R., Beltrán-Garrido, J. M., Otero-Reigada, M.delC., Mollar-Maseres, J., Correcher-Medina, P., Schwarz-Chavarri, G., Gil-Guillén, V., & Valencia Hospital Network for the Study of Influenza and Respiratory Virus Disease (2014). Influenza vaccine effectiveness in preventing influenza A(H3N2)-related hospitalizations in adults targeted for vaccination by type of vaccine: a hospital-based test-negative study, 2011-2012 A(H3N2) predominant influenza season, Valencia, Spain. <i>PloS one</i> , 9(11), e112294. <a href="https://doi.org/10.1371/journal.pone.0112294">https://doi.org/10.1371/journal.pone.0112294</a> | Not all strains                                |
| 75. Cheng, A. C., Dwyer, D. E., Holmes, M., Irving, L. B., Brown, S. G., Waterer, G. W., Korman, T. M., Hunter, C., Hewagama, S., Friedman, N. D., Wark, P. A., Simpson, G., Upham, J. W., Bowler, S. D., Senenayake, S. N., Kotsimbos, T. C., & Kelly, P. M. (2014). Influenza epidemiology, vaccine coverage and vaccine effectiveness in sentinel Australian hospitals in 2013: the Influenza Complications Alert Network. <i>Communicable diseases intelligence quarterly report</i> , 38(2), E143–E149.                                                                                                                                                                                                                                                                                                                                             | Adults not isolated                            |
| 76. Turner, N., Pierse, N., Bissielo, A., Huang, Q., Radke, S., Baker, M., Widdowson, M., Kelly, H., & SHIVERS investigation team (2014). Effectiveness of seasonal trivalent inactivated influenza vaccine in preventing influenza hospitalisations and primary care visits in Auckland, New Zealand, in 2013. <i>Euro surveillance : bulletin Européen sur les maladies transmissibles = European communicable disease bulletin</i> , 19(34), 20884.                                                                                                                                                                                                                                                                                                                                                                                                   | Adults not isolated                            |
| 77. Andrews, N., McMenamin, J., Durnall, H., Ellis, J., Lackenby, A., Robertson, C., von Wismann, B., Cottrell, S., Smyth, B., Moore, C., Gunson, R., Zambon, M., Fleming, D., & Pebody, R. (2014). Effectiveness of trivalent seasonal influenza vaccine in preventing laboratory-confirmed influenza in primary care in the United Kingdom: 2012/13 end of season results. <i>Euro surveillance : bulletin Européen sur les maladies transmissibles = European communicable disease bulletin</i> , 19(27), 5–13.                                                                                                                                                                                                                                                                                                                                       | Adults not isolated                            |
| 78. Savulescu, C., Jiménez-Jorge, S., Delgado-Sanz, C., de Mateo, S., Pozo, F., Casas, I., Larrauri, A., & Spanish Influenza Surveillance System (2014). Higher vaccine effectiveness in seasons with predominant circulation of seasonal influenza A(H1N1) than in A(H3N2) seasons: test-negative case-control studies using surveillance data, Spain, 2003-2011. <i>Vaccine</i> , 32(35), 4404–4411. <a href="https://doi.org/10.1016/j.vaccine.2014.06.063">https://doi.org/10.1016/j.vaccine.2014.06.063</a>                                                                                                                                                                                                                                                                                                                                         | Adults not isolated                            |
| 79. Nunes, B., Machado, A., Guiomar, R., Pechirra, P., Conde, P., Cristovão, P., & Falcão, I. (2014). Estimates of 2012/13 influenza vaccine effectiveness using the case test-negative control design with different influenza negative control groups. <i>Vaccine</i> , 32(35), 4443–4449. <a href="https://doi.org/10.1016/j.vaccine.2014.06.053">https://doi.org/10.1016/j.vaccine.2014.06.053</a>                                                                                                                                                                                                                                                                                                                                                                                                                                                   | Adults not isolated                            |
| 80. Puig-Barberà, J., Natividad-Sancho, A., Launay, O., Burtseva, E., Ciblak, M. A., Tormos, A., Buigues-Vila, A., Martínez-Úbeda, S., Sominina, A., & GIHSN Group (2014). 2012-2013 Seasonal influenza vaccine effectiveness against influenza hospitalizations: results from the global influenza hospital surveillance network. <i>PloS one</i> , 9(6), e100497. <a href="https://doi.org/10.1371/journal.pone.0100497">https://doi.org/10.1371/journal.pone.0100497</a>                                                                                                                                                                                                                                                                                                                                                                              | Insufficient information to determine outcomes |
| 81. Ho, H. P., Zhao, X., Pang, J., Chen, M. I., Lee, V. J., Ang, L. W., Lin, R. V., Gao, C. Q., Hsu, L. Y., & Cook, A. R. (2014). Effectiveness of seasonal influenza vaccinations against laboratory-confirmed influenza-associated infections among Singapore military personnel in 2010-2013. <i>Influenza and other respiratory viruses</i> , 8(5), 557–566. <a href="https://doi.org/10.1111/irv.12256">https://doi.org/10.1111/irv.12256</a>                                                                                                                                                                                                                                                                                                                                                                                                       | Adults not isolated                            |

|                                                                                                                                                                                                                                                                                                                                                                                                                                                                                                                                                                                                                                                                                                                                                                                              |                                                |
|----------------------------------------------------------------------------------------------------------------------------------------------------------------------------------------------------------------------------------------------------------------------------------------------------------------------------------------------------------------------------------------------------------------------------------------------------------------------------------------------------------------------------------------------------------------------------------------------------------------------------------------------------------------------------------------------------------------------------------------------------------------------------------------------|------------------------------------------------|
| 82. Turner, N., Pierse, N., Bissielo, A., Huang, Q. S., Baker, M. G., Widdowson, M. A., Kelly, H., & SHIVERS investigation team (2014). The effectiveness of seasonal trivalent inactivated influenza vaccine in preventing laboratory confirmed influenza hospitalisations in Auckland, New Zealand in 2012. <i>Vaccine</i> , 32(29), 3687–3693. <a href="https://doi.org/10.1016/j.vaccine.2014.04.013">https://doi.org/10.1016/j.vaccine.2014.04.013</a>                                                                                                                                                                                                                                                                                                                                  | Adults not isolated                            |
| 83. McNeil, S., Shinde, V., Andrew, M., Hatchette, T., Leblanc, J., Ambrose, A., Boivin, G., Bowie, W., Diaz-Mitoma, F., Elsherif, M., Green, K., Haguinet, F., Halperin, S., Iburguchi, B., Katz, K., Langley, J., Lagace-Wiens, P., Light, B., Loeb, M., McElhaney, J., ... Toronto Invasive Bacterial Diseases Network (TIBDN) (2014). Interim estimates of 2013/14 influenza clinical severity and vaccine effectiveness in the prevention of laboratory-confirmed influenza-related hospitalisation, Canada, February 2014. <i>Euro surveillance : bulletin European sur les maladies transmissibles = European communicable disease bulletin</i> , 19(9), 20729. <a href="https://doi.org/10.2807/1560-7917.es2014.19.9.20729">https://doi.org/10.2807/1560-7917.es2014.19.9.20729</a> | Adults not isolated                            |
| 84. Suzuki, M., Minh, leN., Yoshimine, H., Inoue, K., Yoshida, L. M., Morimoto, K., & Ariyoshi, K. (2014). Vaccine effectiveness against medically attended laboratory-confirmed influenza in Japan, 2011-2012 Season. <i>PloS one</i> , 9(2), e88813. <a href="https://doi.org/10.1371/journal.pone.0088813">https://doi.org/10.1371/journal.pone.0088813</a>                                                                                                                                                                                                                                                                                                                                                                                                                               | Adults not isolated                            |
| 85. Dawood, F. S., Prapasiri, P., Areerat, P., Ruayajin, A., Chittaganpitch, M., Muangchana, C., Baggett, H. C., & Olsen, S. J. (2014). Effectiveness of the 2010 and 2011 Southern Hemisphere trivalent inactivated influenza vaccines against hospitalization with influenza-associated acute respiratory infection among Thai adults aged $\geq 50$ years. <i>Influenza and other respiratory viruses</i> , 8(4), 463–468. <a href="https://doi.org/10.1111/irv.12233">https://doi.org/10.1111/irv.12233</a>                                                                                                                                                                                                                                                                              | Adults not isolated                            |
| 86. Kulkarni, P. S., Agarkhedkar, S., Lalwani, S., Bavdekar, A. R., Jog, S., Raut, S. K., Parulekar, V., Agarkhedkar, S. S., Palkar, S., & Mangrulkar, S. (2014). Effectiveness of an Indian-made attenuated influenza A(H1N1)pdm 2009 vaccine: a case control study. <i>Human vaccines &amp; immunotherapeutics</i> , 10(3), 566–571. <a href="https://doi.org/10.4161/hv.27490">https://doi.org/10.4161/hv.27490</a>                                                                                                                                                                                                                                                                                                                                                                       | Adults not isolated                            |
| 87. Gefenaite, G., Rahamat-Langendoen, J., Ambrozaitis, A., Mickiene, A., Jancoriene, L., Kuliese, M., Velyvyte, D., Niesters, H., Stolk, R. P., Zagminas, K., & Hak, E. (2014). Seasonal influenza vaccine effectiveness against influenza in 2012-2013: a hospital-based case-control study in Lithuania. <i>Vaccine</i> , 32(7), 857–863. <a href="https://doi.org/10.1016/j.vaccine.2013.12.021">https://doi.org/10.1016/j.vaccine.2013.12.021</a>                                                                                                                                                                                                                                                                                                                                       | Adults not isolated                            |
| 88. Cheng, A. C., Holmes, M., Irving, L. B., Brown, S. G., Waterer, G. W., Korman, T. M., Friedman, N. D., Senanayake, S., Dwyer, D. E., Brady, S., Simpson, G., Wood-Baker, R., Upham, J., Paterson, D., Jenkins, C., Wark, P., Kelly, P. M., & Kotsimbos, T. (2013). Influenza vaccine effectiveness against hospitalisation with confirmed influenza in the 2010-11 seasons: a test-negative observational study. <i>PloS one</i> , 8(7), e68760. <a href="https://doi.org/10.1371/journal.pone.0068760">https://doi.org/10.1371/journal.pone.0068760</a>                                                                                                                                                                                                                                 | Insufficient information to determine outcomes |
| 89. Martínez-Baz, I., Martínez-Artola, V., Reina, G., Guevara, M., Cenoz, M. G., Morán, J., Irisarri, F., Arriazu, M., Albeniz, E., Castilla, J., & Primary Health Care Sentinel Network of Navarre (2013). Effectiveness of the trivalent influenza vaccine in Navarre, Spain, 2010-2011: a population-based test-negative case-control study. <i>BMC public health</i> , 13, 191. <a href="https://doi.org/10.1186/1471-2458-13-191">https://doi.org/10.1186/1471-2458-13-191</a>                                                                                                                                                                                                                                                                                                          | Adults not isolated                            |
| 90. Talbot, H. K., Zhu, Y., Chen, Q., Williams, J. V., Thompson, M. G., & Griffin, M. R. (2013). Effectiveness of influenza vaccine for preventing laboratory-confirmed influenza hospitalizations in adults, 2011-2012 influenza season. <i>Clinical infectious diseases : an official publication of the Infectious Diseases Society of America</i> , 56(12), 1774–1777. <a href="https://doi.org/10.1093/cid/cit124">https://doi.org/10.1093/cid/cit124</a>                                                                                                                                                                                                                                                                                                                               | Adults not isolated                            |

|                                                                                                                                                                                                                                                                                                                                                                                                                                                                                                                                                                                                                                               |                                                |
|-----------------------------------------------------------------------------------------------------------------------------------------------------------------------------------------------------------------------------------------------------------------------------------------------------------------------------------------------------------------------------------------------------------------------------------------------------------------------------------------------------------------------------------------------------------------------------------------------------------------------------------------------|------------------------------------------------|
| 91. Valenciano, M., Kissling, E., & I-MOVE Case-Control Study Team (2013). Early estimates of seasonal influenza vaccine effectiveness in Europe: results from the I-MOVE multicentre case-control study, 2012/13. <i>Euro surveillance : bulletin Europeen sur les maladies transmissibles = European communicable disease bulletin</i> , 18(7), 3.                                                                                                                                                                                                                                                                                          | Adults not isolated                            |
| 92. Castilla, J., Martinez-Baz, I., Martinez-Artola, V., Fernandez-Alonso, M., Reina, G., Guevara, M., Garcia Cenoz, M., Elia, F., Alvarez, N., Barricarte, A., & Ezpeleta, C. (2013). Early estimates of influenza vaccine effectiveness in Navarre, Spain: 2012/13 mid-season analysis. <i>Euro surveillance : bulletin Europeen sur les maladies transmissibles = European communicable disease bulletin</i> , 18(7), 2.                                                                                                                                                                                                                   | Adults not isolated                            |
| 93. Pebody, R., Andrews, N., McMenamin, J., Durnall, H., Ellis, J., Thompson, C. I., Robertson, C., Cottrell, S., Smyth, B., Zambon, M., Moore, C., Fleming, D. M., & Watson, J. M. (2013). Vaccine effectiveness of 2011/12 trivalent seasonal influenza vaccine in preventing laboratory-confirmed influenza in primary care in the United Kingdom: evidence of waning intra-seasonal protection. <i>Euro surveillance : bulletin Europeen sur les maladies transmissibles = European communicable disease bulletin</i> , 18(5), 20389. <a href="https://doi.org/10.2807/ese.18.05.20389-en">https://doi.org/10.2807/ese.18.05.20389-en</a> | Adults not isolated                            |
| 94. Skowronski, D. M., Janjua, N. Z., De Serres, G., Dickinson, J. A., Winter, A. L., Mahmud, S. M., Sabaiduc, S., Gubbay, J. B., Charest, H., Petric, M., Fonseca, K., Van Caesele, P., Kwindt, T. L., Krajden, M., Eshaghi, A., & Li, Y. (2013). Interim estimates of influenza vaccine effectiveness in 2012/13 from Canada's sentinel surveillance network, January 2013. <i>Euro surveillance : bulletin Europeen sur les maladies transmissibles = European communicable disease bulletin</i> , 18(5), 20394. <a href="https://doi.org/10.2807/ese.18.05.20394-en">https://doi.org/10.2807/ese.18.05.20394-en</a>                       | Adults not isolated                            |
| 95. MacIntosh, V. H., Tastad, K. J., & Eick-Cost, A. A. (2013). Mid-season influenza vaccine effectiveness 2011-2012: a Department of Defense Global, Laboratory-based, Influenza Surveillance System case-control study estimate. <i>Vaccine</i> , 31(13), 1651–1655. <a href="https://doi.org/10.1016/j.vaccine.2013.01.022">https://doi.org/10.1016/j.vaccine.2013.01.022</a>                                                                                                                                                                                                                                                              | Insufficient information to determine outcomes |
| 96. Bateman, A. C., Kieke, B. A., Irving, S. A., Meece, J. K., Shay, D. K., & Belongia, E. A. (2013). Effectiveness of monovalent 2009 pandemic influenza A virus subtype H1N1 and 2010-2011 trivalent inactivated influenza vaccines in Wisconsin during the 2010-2011 influenza season. <i>The Journal of infectious diseases</i> , 207(8), 1262–1269. <a href="https://doi.org/10.1093/infdis/jit020">https://doi.org/10.1093/infdis/jit020</a>                                                                                                                                                                                            | Adults not isolated                            |
| 97. Suzuki, M., Yoshimine, H., Harada, Y., Tsuchiya, N., Shimada, I., Ariyoshi, K., & Inoue, K. (2013). Estimating the influenza vaccine effectiveness against medically attended influenza in clinical settings: a hospital-based case-control study with a rapid diagnostic test in Japan. <i>PloS one</i> , 8(1), e52103. <a href="https://doi.org/10.1371/journal.pone.0052103">https://doi.org/10.1371/journal.pone.0052103</a>                                                                                                                                                                                                          | Insufficient information to determine outcomes |
| 98. Centers for Disease Control and Prevention (CDC) (2013). Early estimates of seasonal influenza vaccine effectiveness--United States, January 2013. <i>MMWR. Morbidity and mortality weekly report</i> , 62(2), 32–35                                                                                                                                                                                                                                                                                                                                                                                                                      | Adults not isolated                            |
| 99. Cheng, A. C., Brown, S., Waterer, G., Holmes, M., Senenayake, S., Friedman, N. D., Hewagama, S., Simpson, G., Wark, P., Upham, J., Korman, T., Dwyer, D., Wood-Baker, R., Irving, L., Bowler, S., Kotsimbos, T., & Kelly, P. (2013). Influenza epidemiology, vaccine coverage and vaccine effectiveness in sentinel Australian hospitals in 2012: the Influenza Complications Alert Network (FluCAN). <i>Communicable diseases intelligence quarterly report</i> , 37(3), E246–E252.                                                                                                                                                      | Adults not isolated                            |

**Table S2.** Characteristics of the included RCT studies

(ILI: influenza like illness; ARI: Acute respiratory illness, n: sample size)

| Author          | Country      | Season    | Vaccine | Efficacy | Strain mismatch | Symptoms | Age range | Diagnostic tests |
|-----------------|--------------|-----------|---------|----------|-----------------|----------|-----------|------------------|
| Liebowitiz 2020 | USA          | 2012-2013 | QIV     | 43%      | Matched         | ILI      | 18-65     | PCR              |
| Madhi 2014a     | South Africa | 2011-2012 | TIV     | 50.4%    | Mismatched      | ARI      | 18-38     | PCR              |
| Madhi 2014b     | South Africa | 2011-2012 | TIV     | 57.7%    | Unclear         | ILI      | 18-38     | PCR              |
| Macbride 2017a  | Australia    | 2008-2009 | TIV     | 60.10%   | Matched         | ILI      | 18-64     | PCR              |
| Macbride 2017b  | Australia    | 2008-2009 | TIV     | 42%      | Unclear         | ILI      | 18-64     | PCR              |
| Steinhoff 2017a | Nepal        | 2011-2012 | TIV     | 19%      | Matched         | ILI      | 15-40     | PCR              |
| Steinhoff 2017b | Nepal        | 2012-2013 | TIV     | 0%       | Unclear         | ILI      | 15-40     | PCR              |
| Petrie 2016a    | USA          | 2007-2008 | TIV     | 70%      | Matched         | ILI      | 18-49     | PCR              |
| Petrie 2016b    | USA          | 2007-2008 | LAIV    | 38 %     | Matched         | ILI      | 18-49     | PCR              |



**Table S3.** Characteristics of the included TNS studies

(ILI: influenza like illness; ARI: Acute respiratory illness; RT: rapid test)

| Author                   | Country      | Season    | Vaccine             | Effectiveness (95% CI)<br>extracted from the paper | Strain<br>mismatch | Symptoms       | Age range        | Diagnostic tests |
|--------------------------|--------------|-----------|---------------------|----------------------------------------------------|--------------------|----------------|------------------|------------------|
| Kissling 2023            | Europe       | 2021-2022 | QIV and LAIV        | 41 (25-64)                                         | Mismatched         | ILI and<br>ARI | 15-64            | PCR              |
| Tenforde 2023            | USA          | 2021-2022 | QIV                 | 29 (24-33)                                         | Mismatched         | ILI            | 18-64            | PCR              |
| Kim 2022                 | Canada       | 2021-2022 | QIV                 | not available                                      | Mismatched         | ILI            | 20-64            | PCR              |
| Price 2022               | USA          | 2021-2022 | QIV                 | not available                                      | Mismatched         | ILI            | 18-49            | PCR              |
| Richard 2022a            | USA          | 2012-2013 | LAIV                | not available                                      | Mismatched         | ILI            | 18-64            | PCR, RT, culture |
| Richard 2022b            | USA          | 2013-2014 | LAIV                | not available                                      | Mismatched         | ILI            | 18-64            | PCR, RT, culture |
| Richard 2022c            | USA          | 2014-2015 | LAIV                | not available                                      | Mismatched         | ILI            | 18-64            | PCR, RT, culture |
| Richard 2022d            | USA          | 2012-2013 | TIV                 | not available                                      | Mismatched         | ILI            | 18-64            | PCR, RT, culture |
| Richard 2022e            | USA          | 2013-2014 | TIV                 | not available                                      | Mismatched         | ILI            | 18-64            | PCR, RT, culture |
| Richard 2022f            | USA          | 2014-2015 | TIV                 | not available                                      | Mismatched         | ILI            | 18-64            | PCR, RT, culture |
| Sominina 2021            | Russia       | 2018-2019 | TIV                 | 62 not adjusted                                    | Matched            | ARI            | 18-64            | PCR              |
| Hyder 2021a              | India        | 2018-2019 | QIV                 | 24 (-66–66)                                        | Mismatched         | ILI            | 18-49            | PCR              |
| Hyder 2021b              | India        | 2018-2019 | QIV                 | 49 (-78-85)                                        | Mismatched         | ILI            | 50-64            | PCR              |
| Sturmann 2021a           | Europe       | 2019-2020 | TIV and QIV         | 29 (-3-53)                                         | Mismatched         | ARI            | 18-64            | PCR              |
| Stuurman 2021b           | Europe       | 2019-2020 | TIV and QIV         | 30 (-8-71)                                         | Mismatched         | ILI            | 18-64            | PCR              |
| Grijalva 2021a           | USA          | 2019-2020 | TIV and QIV         | 62 (27-81)                                         | Mismatched         | ARI            | 18-49            | PCR              |
| Grijalva 2021b           | USA          | 2019-2020 | TIV and QIV         | 20 (-48-57)                                        | Mismatched         | ARI            | 50-64            | PCR              |
| Hu 2021                  | USA          | 2019-2020 | Unclear             | 46 (36-55)                                         | Mismatched         | ILI            | 18-64            | PCR              |
| Martin 2020 <sup>a</sup> | USA          | 2016-2017 | QIV                 | 31 (12.4-45)                                       | Matched            | ARI            | >18              | PCR              |
| Martin 2020b             | USA          | 2017-2018 | QIV                 | 34.2 (21.9-44.6)                                   | Matched            | ARI            | >18              | PCR              |
| Stuurman 2020a           | Europe       | 2018-2019 | QIV                 | 40 (2-63)                                          | Matched            | ARI and<br>ILI | 18-64            | PCR and RT       |
| Stuurman 2020b           | Europe       | 2018-2019 | QIV                 | 45 (18-63)                                         | Matched            | ARI and<br>ILI | 18-64            | PCR and RT       |
| Rizzo 2020               | Italy        | 2018-2019 | QIV                 | 40.5 (18.7-56.4)                                   | Mismatched         | ARI            | 18-64            | PCR              |
| Qahtami 2020             | Saudi Arabia | 2018-2019 | TIV                 | 42 (14-64)                                         | Unclear            | ILI            | 18 – working age | PCR              |
| Redlberger-Fritz 2020a   | Austria      | 2016-2017 | QIV, TIV, aTIV,LAIV | -7 (-131-51)                                       | Mismatched         | ILI            | 15-64            | PCR              |
| Redlberger-Fritz 2020b   | Austria      | 2017-2018 | QIV, TIV, aTIV,LAIV | 19 (-63-60)                                        | Mismatched         | ILI            | 15-64            | PCR              |
| Redlberger-Fritz 2020c   | Austria      | 2018-2019 | QIV, TIV, aTIV,LAIV | 51 (-2-76)                                         | Matched            | ILI            | 15-64            | PCR              |

|                       |                |           |                   |                     |            |             |                |            |
|-----------------------|----------------|-----------|-------------------|---------------------|------------|-------------|----------------|------------|
| Rose 2020             | Europe         | 2019-2020 | QIV, TIV and LAIV | 36 (1-58)           | Mismatched | ARI and ILI | 18-64          | PCR        |
| Ando 2019             | Japan          | 2018-2019 | QIV               | 43.4 (17.3-61.2)    | Unclear    | ILI         | 16-64          | RT         |
| Segaloff 2019a        | USA            | 2014-2015 | TIV               | 41.1 (1.7-64.7)     | Mismatched | ARI         | Adults         | PCR        |
| Segaloff 2019b        | USA            | 2015-2016 | TIV               | 68.7 (44.6-82.5)    | Matched    | ARI         | Adults         | PCR        |
| Flannery 2019         | USA            | 2018-2019 | TIV and QIV       | Not available       | Mismatched | ILI         | 18-64          | PCR        |
| Kissling 2019         | Europe         | 2016-2017 | TIV               | 34 (18-46)          | Mismatched | ILI         | 15-64          | PCR        |
| Blanchette 2019       | Canada         | 2010-2011 | TIV               | 34 (20-40)          | Unclear    | ARI         | 18-64          | PCR        |
| Constantino 2019      | Italia         | 2018-2019 | QIV and TIV       | 59.5 (0.03-83.1)    | Matched    | ILI         | 15-64          | PCR        |
| Pebody 2019           | United Kingdom | 2017-2018 | QIV and TIV       | 12.2 (-16.8-34)     | Unclear    | ILI         | 15-64          | PCR        |
| Chon 2019             | Japan          | 2015-2016 | QIV               | 27.3 not adjusted   | Unclear    | ILI         | 19-64          | PCR and RT |
| Molgaard-Nielsen 2019 | Dinamarca      | 2010-2011 | TIV               | 63.9 (29.1-81.6)    | Unclear    | ILI         | Pregnant women | Unclear    |
| Regan 2019            | Australia      | 2016      | QIV               | 31 (3-51)           | Mismatched | ILI         | 18-64          | PCR        |
| Kissling 2019a        | Dinamarca      | 2018-2019 | QIV and TIV       | 55 (44-64)          | Mismatched | ILI         | 18-64          | PCR        |
| Kissling 2019b        | European Union | 2018-2019 | QIV and TIV       | 32 (-31-65)         | Mismatched | ILI         | 18-64          | PCR        |
| Kissling 2019c        | United Kingdom | 2018-2019 | QIV and TIV       | 37 (-20-67)         | Mismatched | ILI         | 18-64          | PCR        |
| Kissling 2019d        | Dinamarca      | 2018-2019 | QIV and TIV       | 39 (14-67)          | Mismatched | ILI         | 18-64          | PCR        |
| Showronski 2019       | Canada         | 2017-2018 | Unclear           | 63 (46-75)          | Matched    | ILI         | 20-64          | PCR        |
| Regan 2019a           | Australia      | 2012      | TIV               | 46% not adjusted    | Unclear    | ILI         | 18-64          | PCR        |
| Regan 2019b           | Australia      | 2013      | TIV               | 57% not adjusted    | Unclear    | ILI         | 18-64          | PCR        |
| Regan 2019c           | Australia      | 2014      | TIV               | 60% not adjusted    | Unclear    | ILI         | 18-64          | PCR        |
| Regan 2019d           | Australia      | 2015      | TIV               | 50% not adjusted    | Unclear    | ILI         | 18-64          | PCR        |
| Thompson 2018a        | USA            | 2010-2011 | Unclear           | 72 (-5-93)          | Unclear    | ARI         | 18-50          | PCR        |
| Thompson 2018b        | USA            | 2011-2012 | Unclear           | 47 (-98-86)         | Unclear    | ARI         | 18-50          | PCR        |
| Thompson 2018c        | USA            | 2012-2013 | Unclear           | 23 (-85-68)         | Unclear    | ARI         | 18-50          | PCR        |
| Thompson 2018d        | USA            | 2013-2014 | Unclear           | 51 (-30-82)         | Unclear    | ARI         | 18-50          | PCR        |
| Thompson 2018e        | USA            | 2014-2015 | Unclear           | 24 (-189-47)        | Unclear    | ARI         | 18-50          | PCR        |
| Thompson 2018f        | USA            | 2015-2016 | Unclear           | 40 (-33-72)         | Unclear    | ARI         | 18-50          | PCR        |
| Flannery 2018a        | USA            | 2017-2018 | QIV and TIV       | 19 (0-34)           | Matched    | ILI         | 18-49          | PCR        |
| Flannery 2018b        | USA            | 2017-2018 | QIV and TIV       | 40 (24-53)          | Matched    | ILI         | 50-64          | PCR        |
| Chan 2018             | China          | 2017-2018 | QIV and TIV       | 71 (42.7-85.8)      | Unclear    | ILI         | 18-64          | PCR        |
| Seki 2018             | Japan          | 2016-2017 | QIV               | 36.5%               | Matched    | ILI         | 15-65          | RT         |
| Wu 2018               | China          | 2016-2017 | TIV               | 4 (-284-76)         | Mismatched | ILI         | 18-59          | PCR        |
| Yaron-Yakobi 2018a    | Israel         | 2014-2015 | QIV, TIV, LAIV    | -53.7 (-116.8-91.4) | Mismatched | ILI         | 18-64          | PCR        |
| Yaron-Yakobi 2018b    | Israel         | 2015-2016 | QIV, TIV, LAIV    | 39.1 (7.8-59.8)     | Mismatched | ILI         | 18-64          | PCR        |
| Showronski 2018       | Canada         | 2017-2018 | QIV and TIV       | 31 (6-49)           | Unclear    | ILI         | 20-64          | PCR        |

|                       |                |           |             |                    |            |     |       |     |
|-----------------------|----------------|-----------|-------------|--------------------|------------|-----|-------|-----|
| Stein 2017a           | Israel         | 2016-2017 | QIV and TIV | 12.5 (-108.7-63.7) | Matched    | ILI | 18-44 | PCR |
| Stein 2017b           | Israel         | 2016-2017 | QIV and TIV | 58.8 (.8-82.9)     | Matched    | ILI | 45-64 | PCR |
| Pelody 2017           | United Kingdom | 2017-2018 | QIV and TIV | 12.2 not adjusted  | Mismatched | ILI | 18-64 | PCR |
| Showronski 2017a      | Canada         | 2015-2016 | TIV         | not available      | Matched    | ILI | 20-49 | PCR |
| Showronski 2017b      | Canada         | 2015-2016 | TIV         | not available      | Matched    | ILI | 50-64 | PCR |
| Kuliese 2017          | Lithuania      | 2015-2016 | TIV         | 61 (-345-97)       | Unclear    | ARI | 18-64 | PCR |
| Ma 2017               | China          | 2014-2015 | TIV         | 60 (-415-50)       | Mismatched | ILI | 18-59 | PCR |
| Seki 2017a            | Japan          | 2013-2014 | QIV         | 56.3 (20.9-75.9)   | Unclear    | ILI | 15-65 | RT  |
| Seki 2017b            | Japan          | 2014-2015 | QIV         | 7.7 (-64-48.1)     | Unclear    | ILI | 15-65 | RT  |
| Seki 2017c            | Japan          | 2015-2016 | QIV         | 52.9 (20-72.3)     | Matched    | ILI | 15-65 | RT  |
| McAnerney 2016        | South Africa   | 2015      | TIV         | 54.4 (-14.1-81.8)  | Unclear    | ILI | 18-64 | PCR |
| Fielding 2016         | Australia      | 2015      | TIV         | 52 (37-63)         | Mismatched | ILI | 18-64 | PCR |
| Petrie 2016a          | USA            | 2014-2015 | QIV         | 67.4 (10.5-88.1)   | Mismatched | ARI | 18-49 | PCR |
| Petrie 2016b          | USA            | 2014-2015 | QIV         | 9.7 (-126.5-64)    | Mismatched | ARI | 50-64 | PCR |
| Rizzo 2016            | Italy          | 2014-2015 | TIV         | -6.3 (-133.6-51.6) | Mismatched | ILI | 15-64 | PCR |
| Lytras 2016           | Greece         | 2014-2015 | TIV         | not available      | Mismatched | ARI | 15-59 | PCR |
| Rondy 2016            | Europe         | 2013-2014 | TIV         | not available      | Matched    | ILI | 18-64 | PCR |
| Gherasim 2016         | Spain          | 2014-2015 | TIV         | not available      | Mismatched | ILI | 15-64 | PCR |
| Redlberger-Fritz 2016 | Austria        | 2014-2015 | TIV         | 54 (-13-82)        | Mismatched | ILI | 15-64 | PCR |
| Kelly 2016a           | Australia      | 2011      | TIV         | not available      | Matched    | ILI | 18-64 | PCR |
| Kelly 2016b           | Australia      | 2011      | TIV         | not available      | Matched    | ILI | 18-64 | PCR |
| Kelly 2016c           | Australia      | 2012      | TIV         | not available      | Mismatched | ILI | 18-64 | PCR |
| Kelly 2016d           | Australia      | 2012      | TIV         | not available      | Mismatched | ILI | 18-64 | PCR |
| Kelly 2016e           | Australia      | 2013      | TIV         | not available      | Mismatched | ILI | 18-64 | PCR |
| Kelly 2016f           | Australia      | 2013      | TIV         | not available      | Mismatched | ILI | 18-64 | PCR |
| Bissielo 2016a        | New Zeland     | 2015      | TIV         | 27 (-8-51)         | Mismatched | ILI | 18-64 | PCR |
| Bissielo 2016b        | New Zeland     | 2015      | TIV         | 46 (1-70)          | Mismatched | ARI | 19-64 | PCR |
| Cheng 2015            | Australia      | 2014      | TIV         | 49.7 (35.3-60.8)   | Matched    | ARI | 16-64 | PCR |
| Levy 2015a            | Thailand       | 2009-2010 | TIV         | not available      | Mismatched | ILI | 18-64 | PCR |
| Levy 2015b            | Thailand       | 2010-2011 | TIV         | not available      | Matched    | ILI | 18-64 | PCR |
| Levy 2015c            | Thailand       | 2011-2012 | TIV         | not available      | Matched    | ILI | 18-64 | PCR |
| Levy 2015d            | Thailand       | 2012-2013 | TIV         | not available      | Mismatched | ILI | 18-64 | PCR |
| McLean 2015           | USA            | 2012-2013 | TIV         | 47                 | Matched    | ARI | 18-64 | PCR |
| McAnerney 2015a       | South Africa   | 2010      | TIV         | 48.4 (-22.2-78.2)  | Matched    | ILI | 18-64 | PCR |
| McAnerney 2015b       | South Africa   | 2011      | TIV         | 58.7 (9.7-81.1)    | Matched    | ILI | 18-64 | PCR |
| McAnerney 2015c       | South Africa   | 2012      | TIV         | 67.1 (-15.6-90.6)  | Mismatched | ILI | 18-64 | PCR |

|                  |              |           |     |                                  |            |     |         |                 |
|------------------|--------------|-----------|-----|----------------------------------|------------|-----|---------|-----------------|
| McAnerney 2015d  | South Africa | 2013      | TIV | 90.7 (36.8-98.6)                 | Matched    | ILI | 18-64   | PCR             |
| McAnerney 2015e  | South Africa | 2014      | TIV | 42.7 (-106.7-84.1)               | Mismatched | ILI | 18-64   | PCR             |
| Rondy 2015       | Europe       | 2012-2013 | TIV | not available                    | Mismatched | ILI | Adultos | PCR             |
| McLean 2015      | USA          | 2012-2013 | TIV | not available                    | Matched    | ARI | 18-64   | PCR             |
| Filipovic 2014   | Croatia      | 2010-2011 | TIV | -19.5 (-240.6-58.1) not adjusted | Matched    | ILI | 18-64   | PCR             |
| Turner 2014a     | New Zealand  | 2014      | TIV | not available                    | Unclear    | ARI | 18-64   | PCR             |
| Turner 2014b     | New Zealand  | 2014      | TIV | not available                    | Unclear    | ILI | 18-64   | PCR             |
| Levy 2014a       | Australia    | 2010      | TIV | 60 (-1-84)                       | Matched    | ILI | 18-64   | PCR             |
| Levy 2014b       | Australia    | 2011      | TIV | 40 (-22-70)                      | Matched    | ILI | 18-64   | PCR             |
| Levy 2014c       | Australia    | 2012      | TIV | 47 (19-65)                       | Matched    | ILI | 18-64   | PCR             |
| Yang 2014        | China        | 2012-2013 | TIV | not available                    | Matched    | ILI | 18-59   | Virus isolation |
| Sullivan 2014    | Australia    | 2012      | TIV | 12 (-22-36)                      | Mismatched | ILI | 18-64   | PCR             |
| Skowronski 2014a | Canada       | 2011-2012 | TIV | 56 (26-74)                       | Mismatched | ILI | 18-64   | PCR             |
| Skowronski 2014b | Canada       | 2013-2014 | TIV | not available                    | Matched    | ILI | 18-64   | PCR             |
| Skowronski 2014c | Canada       | 2012-2013 | TIV | not available                    | Mismatched | ILI | 18-64   | PCR             |
| Kavanagh 2013    | Scotland     | 2010-2011 | TIV | 100 (-349-100)                   | Matched    | ILI | 18-64   | PCR             |
| Castilla 2013    | Spain        | 2011-2012 | TIV | 44 (-11-72)                      | Matched    | ILI | 15-59   | PCR             |

**Table S4.** ROBINS-I overall assessment of the included TND studies by domain

(0: No information; 1: Low; 2: Moderate; 3: Serious; 4: Critical)

| Author                    | Year | DOMAIN           |                |                |                                       |         |         |                       | Overall bias |
|---------------------------|------|------------------|----------------|----------------|---------------------------------------|---------|---------|-----------------------|--------------|
|                           |      | Confounding bias | Selection bias | Classification | Deviation from intended interventions | Missing | Outcome | Selection of subgroup |              |
| Kissling et al            | 2023 | 1                | 4              | 0              | 1                                     | 1       | 1       | 1                     | 0            |
| Tenforde et al            | 2023 | 0                | 1              | 1              | 1                                     | 1       | 1       | 1                     | 0            |
| Kim et al                 | 2022 | 4                | 1              | 4              | 1                                     | 1       | 1       | 1                     | 4            |
| Price et al               | 2022 | 4                | 1              | 3              | 1                                     | 1       | 1       | 1                     | 4            |
| Richard et al             | 2022 | 4                | 1              | 0              | 1                                     | 1       | 4       | 1                     | 0            |
| Sominina A. Et al         | 2021 | 4                | 1              | 4              | 1                                     | 1       | 1       | 1                     | 4            |
| Mir, Hyder et al          | 2021 | 1                | 1              | 3              | 1                                     | 1       | 1       | 1                     | 3            |
| Stuurmann, A et al        | 2021 | 1                | 1              | 3              | 1                                     | 1       | 1       | 1                     | 3            |
| Grijalva C.G. et al       | 2021 | 1                | 1              | 1              | 1                                     | 1       | 1       | 1                     | 1            |
| Hu, Wemping et al         | 2021 | 1                | 1              | 3              | 1                                     | 1       | 1       | 1                     | 3            |
| Martin E. T. et al        | 2020 | 1                | 1              | 2              | 1                                     | 1       | 4       | 1                     | 4            |
| Stuurman A. L. et al      | 2020 | 1                | 1              | 1              | 1                                     | 3       | 4       | 1                     | 4            |
| Rizzo C. et al            | 2020 | 1                | 4              | 1              | 1                                     | 1       | 1       | 1                     | 4            |
| Qahtami A.A.A. Et al      | 2020 | 1                | 1              | 1              | 1                                     | 1       | 1       | 1                     | 1            |
| Redlberger-Fritz M. et al | 2020 | 1                | 1              | 0              | 1                                     | 1       | 1       | 1                     | 0            |
| Rose A. Et al             | 2020 | 1                | 1              | 0              | 1                                     | 1       | 1       | 1                     | 0            |
| Ando S.                   | 2019 | 1                | 1              | 0              | 1                                     | 1       | 1       | 1                     | 0            |
| Segaloff H. et al         | 2019 | 1                | 1              | 4              | 1                                     | 1       | 1       | 1                     | 4            |
| Flannery B. et al         | 2019 | 4                | 1              | 4              | 1                                     | 1       | 1       | 1                     | 4            |
| Kissling E. et al         | 2019 | 1                | 1              | 4              | 1                                     | 3       | 1       | 1                     | 4            |
| Blanchette, p et al       | 2019 | 1                | 1              | 1              | 1                                     | 1       | 1       | 1                     | 1            |
| Constantino C. Et al      | 2019 | 1                | 1              | 1              | 1                                     | 1       | 1       | 1                     | 1            |
| Pebody R et al            | 2019 | 1                | 1              | 4              | 1                                     | 1       | 1       | 1                     | 4            |
| Chon I. et al             | 2019 | 4                | 1              | 0              | 1                                     | 1       | 4       | 1                     | 0            |
| Molgaard-Nielsen et al    | 2019 | 1                | 1              | 1              | 1                                     | 3       | 4       | 1                     | 4            |
| Regan A et al             | 2019 | 1                | 1              | 1              | 1                                     | 1       | 1       | 1                     | 1            |
| Kissling E. et al         | 2019 | 1                | 1              | 0              | 1                                     | 0       | 1       | 1                     | 0            |
| Showronski D et al        | 2019 | 1                | 1              | 4              | 1                                     | 1       | 1       | 1                     | 4            |
| Regan A. Et al            | 2019 | 1                | 1              | 1              | 1                                     | 1       | 1       | 1                     | 1            |



|                           |      |   |   |   |   |   |   |   |   |
|---------------------------|------|---|---|---|---|---|---|---|---|
| Thompson M. et al         | 2018 | 1 | 1 | 0 | 1 | 1 | 0 | 1 | 0 |
| Flannery B. et al         | 2018 | 1 | 1 | 3 | 1 | 1 | 1 | 1 | 3 |
| Chan Y. et al             | 2018 | 1 | 1 | 4 | 1 | 1 | 4 | 1 | 4 |
| Seki Y. et al             | 2018 | 1 | 1 | 0 | 1 | 1 | 1 | 1 | 0 |
| Wu S. et al               | 2018 | 1 | 1 | 0 | 1 | 1 | 1 | 1 | 0 |
| Yaron-Yakobi H. et al     | 2018 | 1 | 1 | 4 | 1 | 1 | 1 | 1 | 4 |
| Showronski D et al        | 2018 | 1 | 1 | 3 | 1 | 1 | 1 | 1 | 3 |
| Stein Y. et al            | 2017 | 1 | 1 | 4 | 1 | 1 | 1 | 1 | 4 |
| Pelody R. et al           | 2017 | 4 | 1 | 4 | 1 | 1 | 1 | 1 | 4 |
| Showronski D et al        | 2017 | 4 | 1 | 4 | 1 | 1 | 1 | 1 | 4 |
| Kuliese M. et al          | 2017 | 1 | 1 | 1 | 1 | 3 | 1 | 1 | 3 |
| Ma C. et al               | 2017 | 1 | 1 | 1 | 1 | 1 | 1 | 1 | 1 |
| Seki Y. et al             | 2017 | 1 | 1 | 1 | 1 | 1 | 1 | 1 | 1 |
| McAnerney J. et al        | 2016 | 1 | 1 | 3 | 1 | 1 | 1 | 1 | 3 |
| Fielding J. et al         | 2016 | 1 | 1 | 3 | 1 | 1 | 1 | 1 | 3 |
| Petrie J. et al           | 2016 | 1 | 1 | 4 | 1 | 1 | 1 | 1 | 4 |
| Rizzo C. et al            | 2016 | 1 | 1 | 4 | 1 | 1 | 1 | 1 | 4 |
| Lytras t. et al           | 2016 | 4 | 1 | 4 | 1 | 1 | 1 | 1 | 4 |
| Rondy A. Et al            | 2016 | 4 | 1 | 3 | 1 | 1 | 1 | 1 | 4 |
| Gherasim A. Et al         | 2016 | 4 | 4 | 3 | 1 | 1 | 1 | 1 | 4 |
| Redlberger-Fritz M. et al | 2016 | 1 | 1 | 0 | 1 | 1 | 1 | 1 | 0 |
| Kelly H. et al            | 2016 | 4 | 1 | 3 | 1 | 1 | 1 | 1 | 4 |
| Bissielo A. et al         | 2016 | 1 | 1 | 1 | 1 | 1 | 1 | 1 | 1 |
| Cheng et al               | 2015 | 1 | 1 | 3 | 1 | 4 | 1 | 1 | 4 |
| Levy et al                | 2015 | 4 | 1 | 4 | 1 | 1 | 1 | 1 | 4 |
| McAnerney et al           | 2015 | 1 | 1 | 3 | 1 | 1 | 1 | 1 | 3 |
| McAnerney et al           | 2015 | 1 | 1 | 3 | 1 | 1 | 1 | 1 | 3 |
| Rondy et al               | 2015 | 4 | 1 | 3 | 1 | 1 | 1 | 1 | 4 |
| Filipovic et al           | 2015 | 4 | 3 | 3 | 1 | 1 | 1 | 1 | 4 |
| McLean et al              | 2015 | 4 | 1 | 1 | 1 | 1 | 1 | 1 | 4 |
| Turner et al              | 2014 | 4 | 1 | 3 | 1 | 1 | 1 | 1 | 4 |
| Levy et al                | 2014 | 1 | 1 | 3 | 1 | 1 | 1 | 1 | 3 |
| Yang et al                | 2014 | 4 | 1 | 4 | 1 | 1 | 1 | 1 | 4 |
| Sullivan et al            | 2014 | 1 | 1 | 0 | 1 | 1 | 1 | 1 | 0 |
| Skowronski et al          | 2014 | 4 | 1 | 4 | 1 | 1 | 4 | 1 | 4 |
